# Supplementary material for: Structural and functional insights into the p160 Rho-associated coiled-coil-containing protein kinase ROCK
Source: Research Square preprint supplement (doi:10.21203/rs.3.rs-8784410/v1), 2026-02-05
Supplement: Supplementary file 1 [file 01f729db9c9dbd2b4bf1992d.pdf]

# Supplementary Materials

## Structural and functional insights into the p160 Rho-associated coiled-coil-containing protein kinase ROCK\*

Badri Nath Dubey<sup>1,2,&@</sup>, Soheila Rezaei Adariani<sup>1,&#</sup>, Lothar Gremer<sup>1,4,5</sup>, Radovan Dvorsky<sup>1</sup>, Yan, Nie<sup>6,#</sup>, Ehsan Amin<sup>1</sup>, Jens M. Moll<sup>1</sup>, Sicai Zhang<sup>1,#</sup>, Sander H.J. Smits<sup>7</sup>, Melissa A. Graewert<sup>8</sup>, Dieter Willbold<sup>4,5</sup>, Georg Groth<sup>9</sup>, Luitgard Nagel<sup>4</sup>, Sabrina Pospich<sup>6</sup>, and Mohammad R. Ahmadian<sup>1@</sup>

<sup>1</sup> Institute of Biochemistry and Molecular Biology II, Medical Faculty and University Hospital Düsseldorf, Heinrich Heine University, Universitätsstraße 1, 40225 Düsseldorf, Germany.

<sup>2</sup> Department of Biosciences and Bioengineering, Indian Institute of Technology Dharwad, Dharwad 580011, Karnataka, India.

<sup>3</sup> Department of Cancer Biology & Molecular Medicine, Beckman Research Institute of City of Hope, Duarte, CA, USA

<sup>4</sup> Institute of Physical Biology, Heinrich Heine University, Universitätsstraße 1, 40225 Düsseldorf, Germany

<sup>5</sup> Institute of Biological Information Processing, Structural Biochemistry (IBI-7), Research Centre Jülich, Leo-Brandt-Str. 5, 52425 Jülich, Germany.

<sup>6</sup> Department of Structural Biochemistry, Max Planck Institute of Molecular Physiology, Otto Hahnstraße 11, 44227 Dortmund, Germany.

<sup>7</sup> Institute of Biochemistry and Center for Structural Studies, Heinrich Heine University, Universitätsstraße 1, 40225 Düsseldorf, Germany.

<sup>8</sup> European Molecular Biology Laboratory, Notkestraße 85, 22607 Hamburg, Germany.

<sup>9</sup> Department of Biochemical Plant Physiology, Heinrich Heine University, Universitätsstraße 1, 40225 Düsseldorf, Germany.

& Authors contributed equally.

@ Correspondence: [badrinathdubey@iitdh.ac.in](mailto:badrinathdubey@iitdh.ac.in); [reza.ahmadian@hhu.de](mailto:reza.ahmadian@hhu.de)

\* *Running title*: New structural framework for RHO kinase

# Current address: Soheila Rezaei Adariani, Department of Neurosurgery, City of Hope Beckman Research Institute and Medical Center, Duarte, CA, USA; Sicai Zhang, Shanghai Institute for Advanced Immunochemical Studies, ShanghaiTech University, 201210 Shanghai, China; Yang Nie, Institute of Future Agriculture, Northwest Agriculture and Forestry University, Yangling, Shaanxi 712100, China.

57  
58  
59

**Table S1.** X-ray data collection and refinement statistics of ROCK<sup>HR1(Se-Met)</sup>

| <b>Data collection</b>                   |                                           |
|------------------------------------------|-------------------------------------------|
| Wavelength (Å)                           | 0.979240                                  |
| Resolution (Å)                           | 37.0-2.2                                  |
| Number of observed reflections           | 116242                                    |
| Number of unique reflections             | 30449                                     |
| Completeness (%)                         | 99.4 (98.6)                               |
| Redundancy                               | 3.82 (3.78)                               |
| R <sub>merge</sub> (%)                   | 8.3 (55.2)                                |
| I/σ(I)                                   | 11.57 (2.83)                              |
| Space group                              | C2221                                     |
| Unit cell                                | 48.26, 87.07, 148.22 90.00° 90.00° 90.00° |
| <b>Phasing</b>                           |                                           |
| Selenium-atom sites                      | 5 (final model 8)                         |
| Figure of merit (acentric/centric)       | 0.69/0.64                                 |
| Resolution range (Å)                     | 19.92-2.50                                |
| <b>Refinement</b>                        |                                           |
| Resolution                               | 37.0-2.2                                  |
| R <sub>work</sub> /R <sub>free</sub> (%) | 21.8/28.9                                 |
| Number of reflections in test set        | 1106                                      |
| Average B-factor (Å <sup>2</sup> )       | 39.0                                      |
| <b>Deviations from ideal geometry</b>    |                                           |
| Bond lengths (Å)                         | 0.010                                     |
| Bond angles (°)                          | 1.14                                      |
| Ramachandran plot (%)                    | 99.6                                      |

Values in parentheses are for the highest resolution shell (2.3-2.2); R<sub>free</sub> calculated with 5 % of the data that were not used for refinement.

60

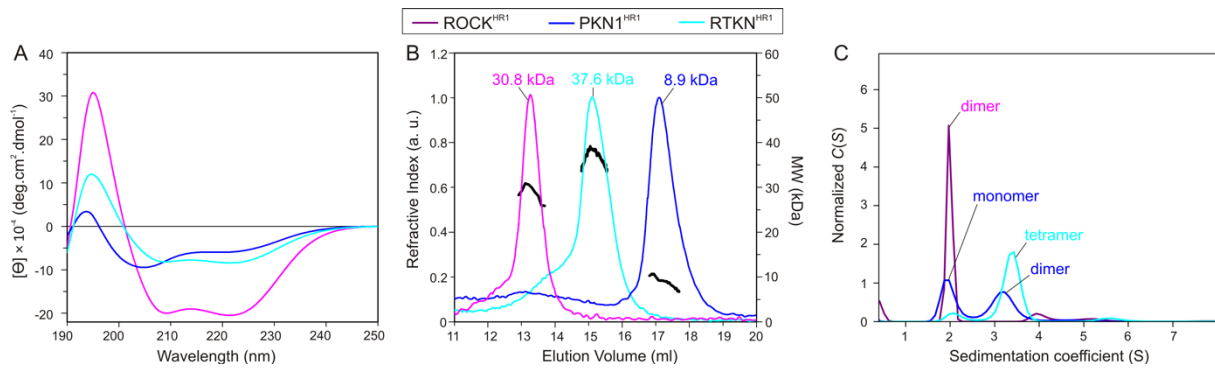

**Figure S1. Biophysical properties of the HR1 domains of ROCK, PKN1, and RTKN.** (A) Far-ultraviolet circular dichroism (Far-UV CD) spectra. The CD data were adjusted for molar ellipticity ( $\Theta$ ), taking into account the concentration and molar mass of the protein samples. Each spectrum is the average of ten replicate scans. The spectra exhibit typical  $\alpha$ -helical profiles, displaying a minimum at 208 nm and 222 nm, except for PKN1<sup>HR1</sup>, which exhibits a minimum at 204 nm instead of 208 nm. (B) Size exclusion chromatography-multiangle light scattering (SEC-MALS) analysis. The protein elution profile by refractive index (RI). The horizontal black line indicates the molar mass of the respective proteins. (C) Sedimentation velocity (SV) analysis. This is a comparison plot of the diffusion-corrected integral sedimentation coefficient distributions obtained from van Holde-Weischet analyses. PKN1<sup>HR1</sup> is shown in blue, ROCK<sup>HR1</sup> in magenta, and RTKN<sup>HR1</sup> in cyan. All data are summarized in [Table 1](#).

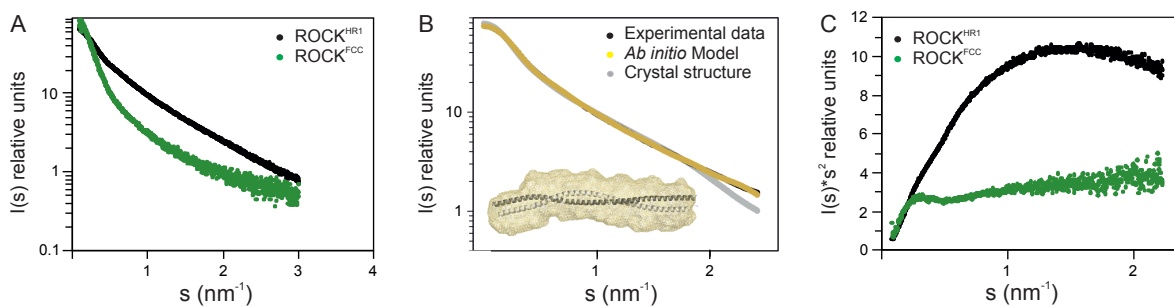

**Figure S2. Structural properties of ROCK<sup>HR1</sup> in solution obtained by small-angle X-ray scattering (SAXS).** (A) The forward scattering intensities were recorded for ROCK<sup>HR1</sup> (in black) and ROCK<sup>FCC</sup> (in green). The experimental data are shown as dots. The scattering from *ab initio* models computed by DAMMIF, and the fit from the crystal structure are shown as continuous white lines. The inset shows the ROCK<sup>HR1</sup> crystal structure superimposed on the averaged ROCK<sup>HR1</sup> bead model (in orange), which was calculated using DAMMIF. (B) This shows the experimental scattering data, a theoretical scattering pattern calculated from the crystal structure of ROCK<sup>HR1</sup> using CRY SOL, and a ROCK<sup>HR1</sup> *ab initio* model calculated from 20 independent DAMMIF runs. The inset shows the SAXS-derived ROCK<sup>HR1</sup> *ab initio* model superimposed with the ROCK<sup>HR1</sup> crystal structure. (C) Kratky plots of ROCK<sup>HR1</sup> and ROCK<sup>FCC</sup>. All data are summarized in [Table 1](#).

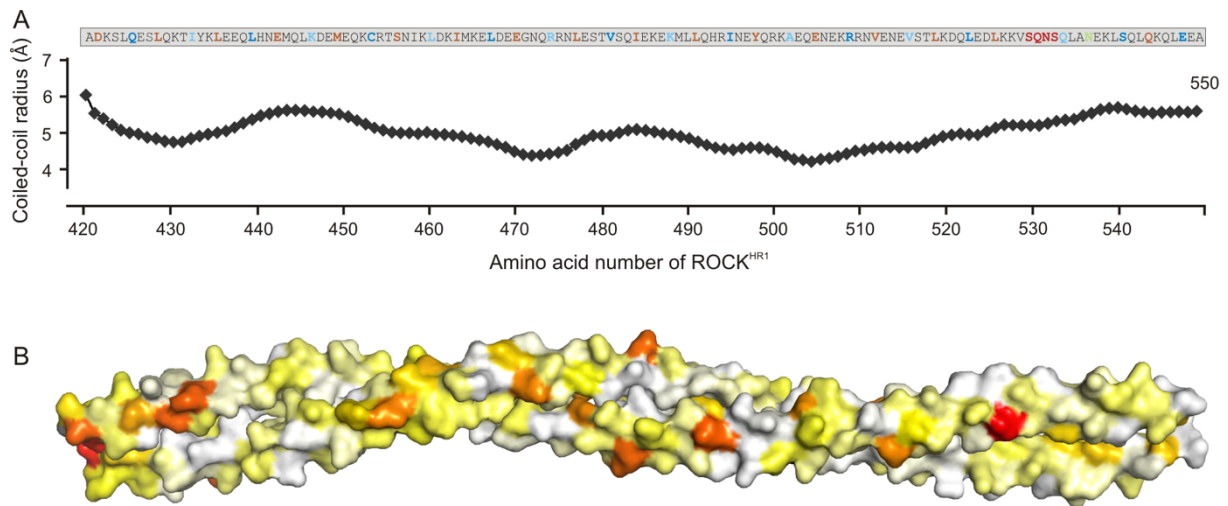

**Figure S3.** Structural characteristics of ROCK<sup>HR1</sup> coiled-coil dimer. **(A)** The radius of the coiled-coil is plotted as a function of amino acid number. The amino acid sequence, including the heptad repeats, is shown above. **(B)** The conservation of residues of ROCK<sup>HR1</sup> is mapped onto the overall surface of the coiled-coil. The color gradient, ranging from white through yellow, orange to red correlates with residue variability, from conserved to most variable.

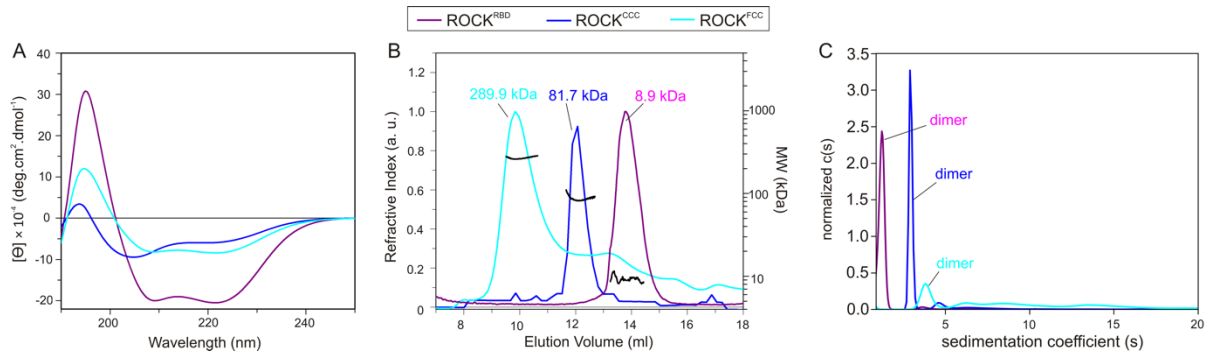

**Figure S4. Biophysical properties of ROCK<sup>RBD</sup>, ROCK<sup>CCC</sup>, and ROCK<sup>FCC</sup>.** Far-UV CD spectra (A), SEC-MALS (B), and SV analyses (C). Comparison plot of the diffusion-corrected integral sedimentation coefficient distributions obtained from van Holde-Weischet analyses. ROCK<sup>RBD</sup> is shown in magenta, ROCK<sup>CCC</sup> in blue, and ROCK<sup>FCC</sup> in cyan. Analyses were conducted for various fragments of the central amphipathic region of ROCK. All data are summarized in Table 1.

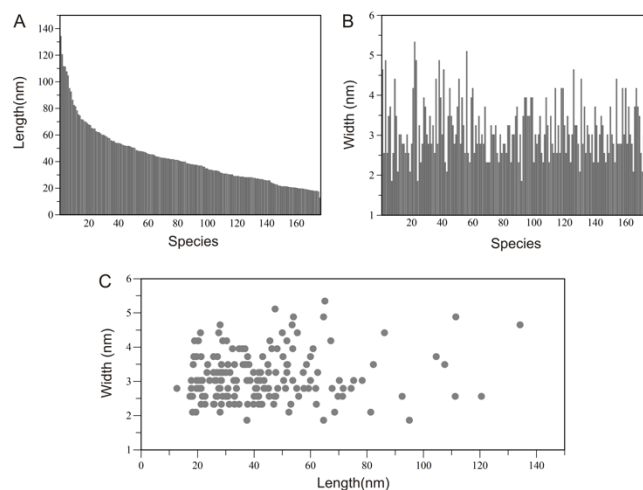

**Figure S5. Length and width variations of ROCK<sup>FCC</sup> molecules.** A quantitative analysis of negatively stained ROCK<sup>FCC</sup> molecules reveals an average length of  $42.6 \pm 21.7$  nm (A) and an average width of  $3.1 \pm 0.7$  nm (B). The lengths of the rods are ordered from longest to shortest. (C) Length-width relationship for all particles.

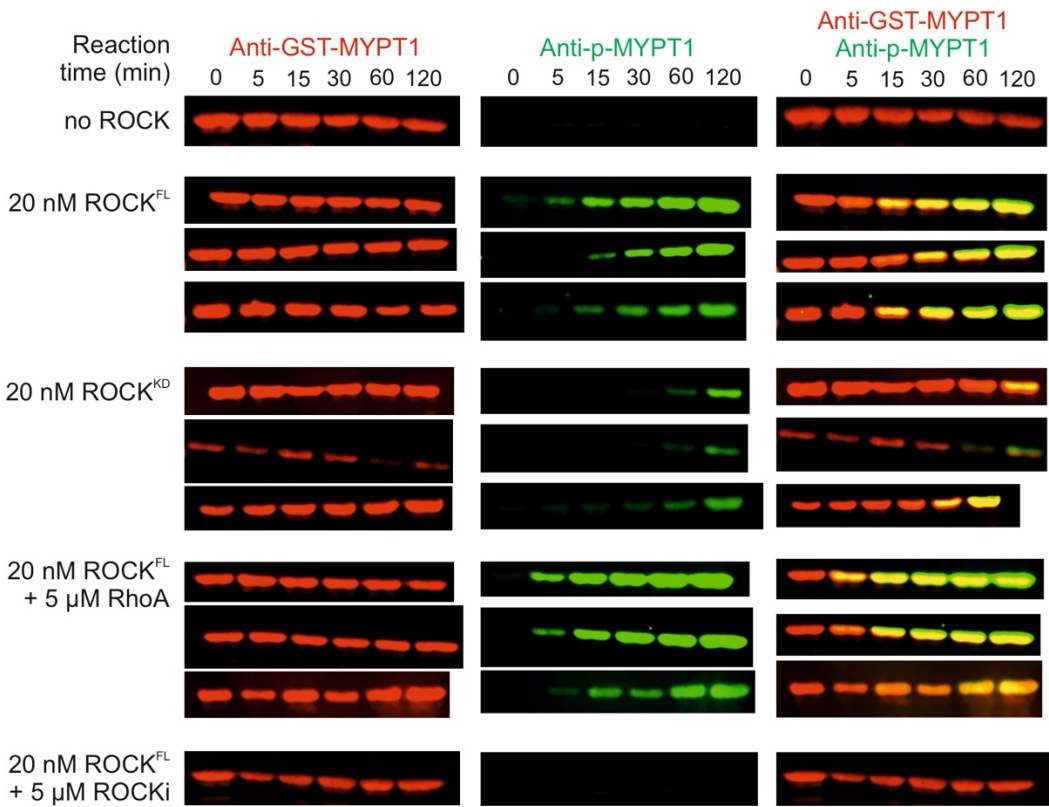

**Figure S6. The phosphorylation of MYPT1 by ROCK<sup>FL</sup> in both the absence and presence of GppNHp-bound RHOA was examined at various time intervals and at a temperature of 25°C.** Proteins were purified from the insect cells and *E. coli*. The samples were analyzed by Western blotting using antibodies against GST-MYPT1 and p-MYPT1. As controls, the experiments were performed in the absence of ROCK<sup>FL</sup>, and with ROCK<sup>KD</sup>, and in the presence of the ROCK inhibitor Y-27632, all under the same conditions.
